# Supplementary material for: Chemotaxonomy of domesticated grasses: a pathway to understanding the origins of agriculture
Source: Copernicus journal article supplement (doi:10.5194/jm-38-83-2019), 2019-06-07
Supplement: Supplementary file 1 [file jm-38-83-2019-supplement.pdf]

Supplement of J. Micropalaeontol., 38, 83–95, 2019  
<https://doi.org/10.5194/jm-38-83-2019-supplement>  
© Author(s) 2019. This work is distributed under  
the Creative Commons Attribution 4.0 License.

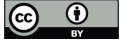

*Supplement of*

## **Chemotaxonomy of domesticated grasses: a pathway to understanding the origins of agriculture**

**Phillip E. Jardine et al.**

*Correspondence to:* Phillip E. Jardine ([jardine@uni-muenster.de](mailto:jardine@uni-muenster.de))

The copyright of individual parts of the supplement might differ from the CC BY 4.0 License.

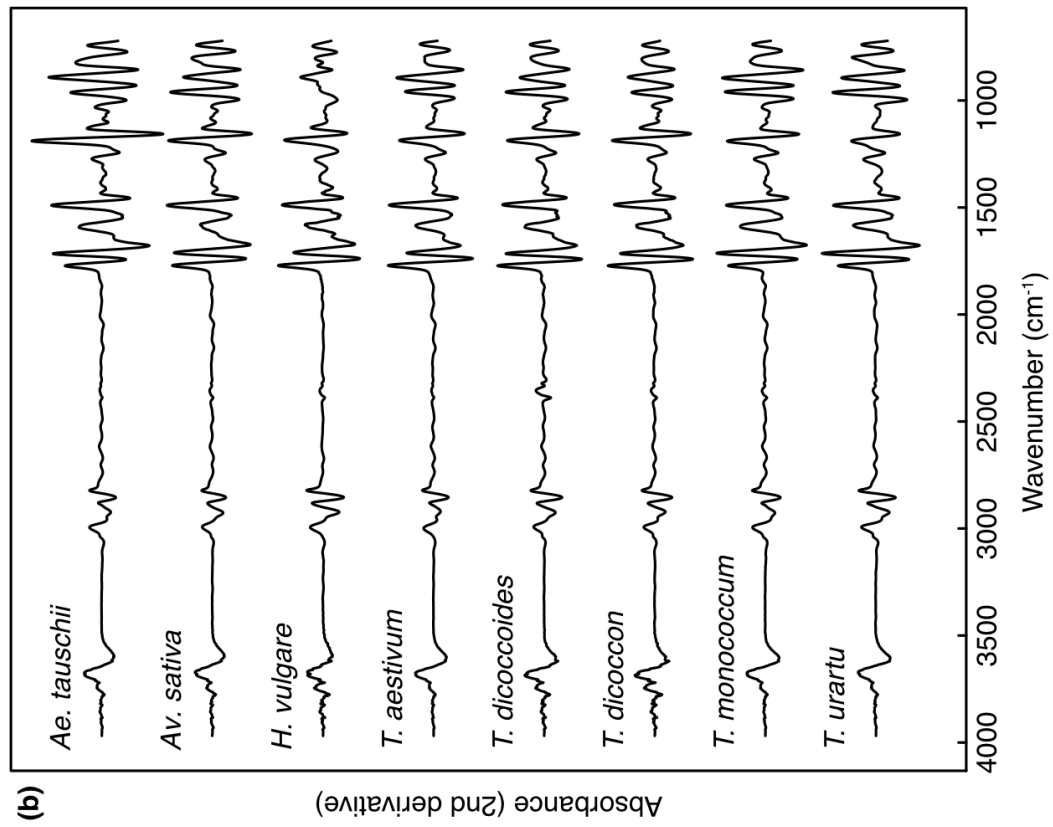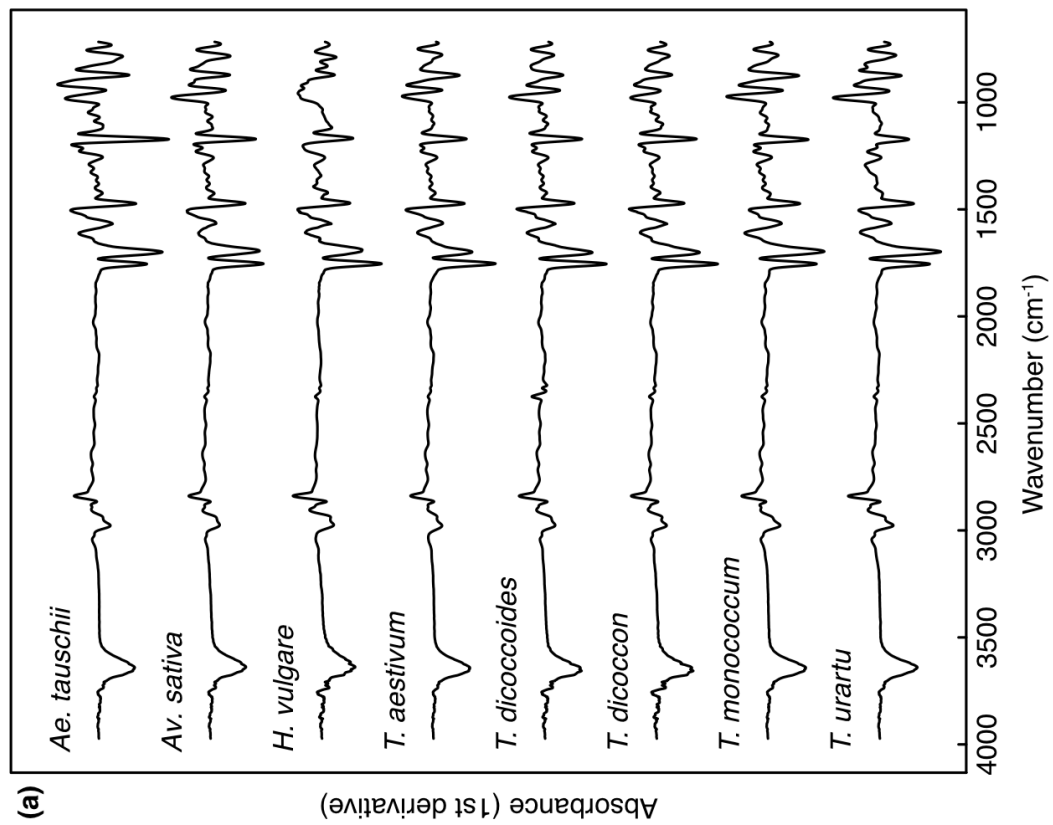

Figure S1: First derivative (a) and second derivative (b) spectra, showing the mean spectrum for each species.

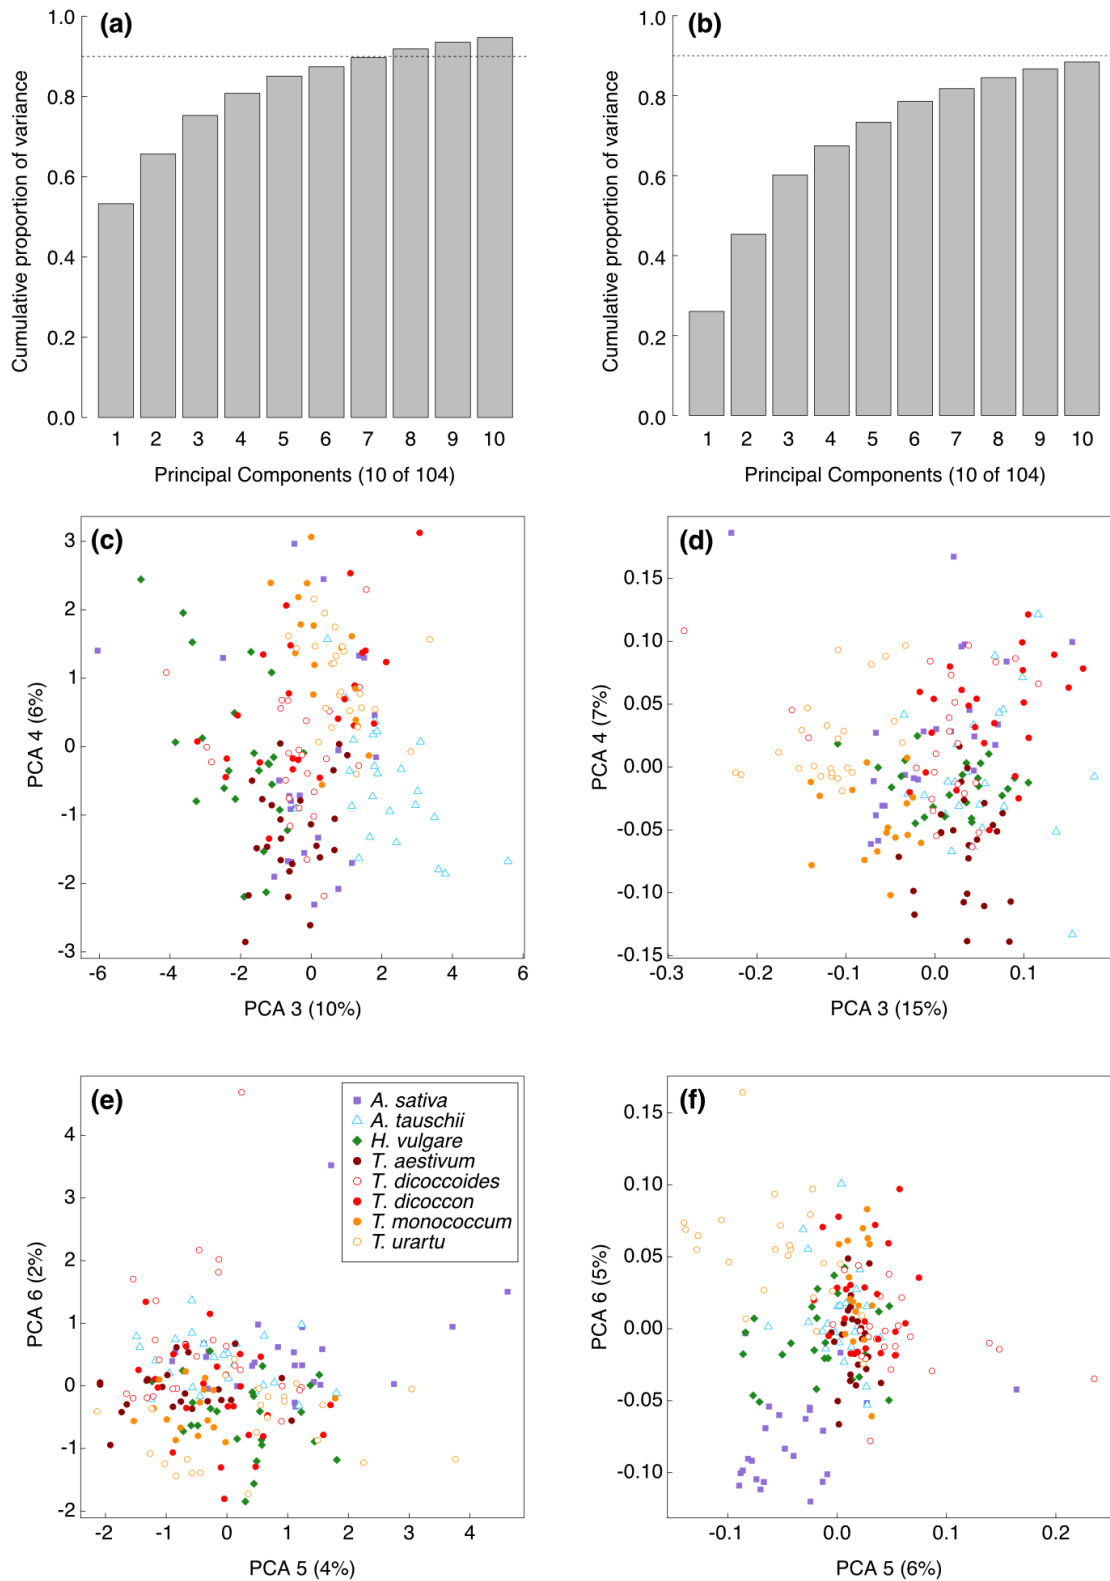

**Figure S2: Further PCA information for (a, c, e) unprocessed FTIR spectra, and (b, d, f) FTIR spectra processed with Savitzky-Golay smoothing and first derivatives. (a and b) cumulative proportion of variance explained by PCA axes, with horizontal dashed line showing 90% explained variance. (c and d) PCA axes 3 and 4, (e and f) PCA axes 5 and 6.**
